1  
2  
3  
4  
5  
6  
7  
8  
9  
10  
11  
12  
13  
14  
15  
16  
17  
18  
19  
20  
21  
22  
23  
24  
25  
26  
27  
28  
29  
30  
31  
32  
33  
34  
35  
36  
37  
38  
39  
40  
41  
42  
43  
44  
45  
46

## Sex differences in brain correlates of STEM anxiety

Ariel A. Gonzalez<sup>1†</sup>, Katherine L. Bottenhorn<sup>1,2†</sup>, Jessica E. Bartley<sup>1,3</sup>, Timothy Hayes<sup>2</sup>, Michael C. Riedel<sup>1,3</sup>, Taylor Salo<sup>1,2</sup>, Elsa I. Bravo<sup>2</sup>, Rosalie Odean<sup>4</sup>, Alina Nazareth<sup>5</sup>, Robert W. Laird<sup>1,3</sup>, Matthew T. Sutherland<sup>1,2</sup>, Eric Brew<sup>6,7,8</sup>, Shannon M. Pruden<sup>2</sup>, Angela R. Laird<sup>1,3\*</sup>

<sup>1</sup>Center for Imaging Science, Florida International University, Miami, FL, USA

<sup>2</sup>Department of Psychology, Florida International University, Miami, FL, USA

<sup>3</sup>Department of Physics, Florida International University, Miami, FL, USA

<sup>4</sup>School of Education, University of Delaware, Newark, DE, USA

<sup>5</sup>Department of Psychology, Temple University, Philadelphia, PA, USA

<sup>6</sup>Department of Physics, Drexel University, Philadelphia, PA, USA

<sup>7</sup>Department of Education, Drexel University, Philadelphia, PA, USA

<sup>8</sup>Department of Teaching and Learning, Florida International University, Miami, FL, USA

### **\*Corresponding Author**

Dr. Angela R. Laird, Ph.D.  
Professor, Department of Physics  
Florida International University, AHC4 310  
Modesto Maidique Campus  
11200 SW 8<sup>th</sup> Street  
Miami, FL 33199  
305.348.6737 (phone)  
305.348.6700 (fax)  
[alaird@fiu.edu](mailto:alaird@fiu.edu)

<sup>†</sup>These authors contributed equally to this work.

47 **ABSTRACT**

48  
49  
50  
51  
52  
53  
54  
55  
56  
57  
58  
59  
60  
61  
62  
63  
64  
65  
66  
67  
68  
69  
70  
71  
72  
73  
74  
75  
76  
77  
78  
79  
80  
81  
82  
83  
84  
85  
86  
87  
88  
89  
90  
91  
92  
93

Anxiety is known to dysregulate the salience, default mode, and central executive networks of the human brain, yet this phenomenon has not been fully explored across the STEM learning experience, where anxiety can impact negatively academic performance. Here, we evaluated anxiety and large-scale brain connectivity in 101 undergraduate physics students. We found sex differences in STEM-related and clinical anxiety, with longitudinal increases in science anxiety observed for both female and male students. Sex-specific relationships between STEM anxiety and brain connectivity emerged, with male students exhibiting distinct inter-network connectivity for STEM and clinical anxiety and female students demonstrating no significant within-sex correlations. Anxiety was negatively correlated with academic performance in sex-specific ways at both pre- and post-instruction. Moreover, math anxiety in male students mediated the relation between default mode-salience connectivity and course grade. Together, these results reveal complex sex differences in the neural mechanisms driving how anxiety is related to STEM learning.

94 Today's universities and colleges are tasked with the challenge of developing novel strategies for  
95 improving undergraduate academic performance and ensuring that students are prepared for successful  
96 careers. In particular, emphasis is placed on enhancing student outcomes and generating enthusiasm for  
97 the science, technology, engineering, and mathematics (STEM) disciplines. However, STEM students  
98 encounter multiple, major-specific challenges, including intensive laboratory, project-based, and lecture-  
99 based coursework (Thiry et al., 2011), heightened classroom competition (Strenta et al., 1994; Gasiewski  
100 et al., 2012), and academic challenges of STEM courses (Strenta et al., 1994; Rask, 2010). As such, many  
101 students often struggle with STEM-related anxiety, which manifests as an unease, avoidance, or fear of  
102 learning science or math topics. In particular, female STEM students, relative to their male counterparts,  
103 are disproportionately affected by higher rates of STEM anxiety (Mallow, 1994; Brownlow et al., 2000;  
104 Baloglu and Kocak, 2006; Mallow et al., 2010). This may be due to STEM-related barriers that adversely  
105 impact achievement and performance (Kiefer and Sekaquaptewa, 2007; Nosek et al., 2009), including  
106 stereotype threat (Shapiro and Williams, 2012), gender-based bias (Moss-Racusin et al., 2012), and lack of  
107 non-stereotypical role models (Cheryan et al., 2011; Hernandez et al., 2018).

108  
109 Despite the wealth of literature regarding STEM anxiety, little work has characterized the large-scale brain  
110 networks that may be linked with this barrier to learning and achievement in STEM students. However,  
111 significant prior neuroimaging research has contributed to our understanding of the neurobiological  
112 substrates of clinical anxiety and related psychiatric disorders (for reviews see: e.g., Peterson et al., 2014;  
113 Mochcovitch et al., 2014; Williams et al., 2017; Kim et al., 2018). In the context of psychopathology, a  
114 relatively recent paradigm shift from functional localization studies to large-scale brain network studies  
115 has occurred. Psychopathological processes, especially those found in mood disorders, are associated  
116 with aberrant organization and functioning of three key networks. First, the salience network (SN),  
117 anchored in the dorsal anterior cingulate cortex and frontoinsula cortex, plays a critical role in saliency  
118 detection, and attentional capture (Seeley et al., 2007; Menon and Uddin, 2010). Second, the default  
119 mode network (DMN), which includes the major nodes of the posterior cingulate and medial prefrontal  
120 cortices, is involved in self-referential processes and typically deactivates during stimulus-driven cognitive  
121 tasks (Greicius et al., 2003; Raichle, 2015). Third, the central executive network (CEN) is a frontoparietal  
122 system that includes the dorsolateral prefrontal and lateral posterior parietal cortices and is involved with  
123 cognitive processes such as working memory, problem solving, and goal-directed behavior (Dosenbach et  
124 al., 2007; Seeley et al., 2007). The interactions of these three large-scale networks underlies a unifying  
125 tripartite network model that seeks to characterize the maladaptive network organization and function  
126 common across psychiatric disorders (Menon, 2011; Sha et al., 2018). Within anxiety-related disorders,  
127 increased interactions between the SN, DMN, and CEN have been consistently observed (Sripada et al.,  
128 2012; Zhang et al., 2015) and SN-CEN and DMN-SN disruptions have been associated with trait anxiety in  
129 obsessive compulsive disorder (Fan et al., 2017) and diagnostic status in social anxiety disorder (Rabany et  
130 al., 2017). As hallmarks of STEM anxiety are similar to those of clinical anxiety (i.e., rumination, avoidance,  
131 over-generalization of threat stimuli), we expect these same large-scale networks to underlie anxiety in  
132 STEM students.

133  
134 Here, we sought to bridge these research domains by examining the neurobiological correlates of STEM  
135 anxiety using the tripartite network model and its noted dysfunction in the context of clinical anxiety as a  
136 starting point. Given prior evidence in sex differences in STEM anxiety (Mallow, 1994; Brownlow et al.,  
137 2000; Baloglu and Kocak, 2006; Mallow et al., 2010), the present study investigated their neural substrates  
138 to advance towards a more complete model of anxiety-related mechanisms and strategies associated with  
139 learning processes. We examined if functional connectivity between the SN, DMN, and CEN is associated  
140 with STEM anxiety and whether this may differ among female and male STEM students. To this end, we  
141 collected self-report questionnaire and neuroimaging data from 101 university students (46F, 55M) who

142 enrolled in and completed the first semester of a two-semester sequence of calculus-based, introductory  
 143 physics. Introductory physics is a core “gateway” course on Newtonian mechanics and is required for  
 144 undergraduate students seeking a university degree across a broad range of STEM fields, including  
 145 chemistry, physics, engineering, or mathematics. Students completed behavioral and resting state  
 146 functional magnetic resonance imaging (rs-fMRI) sessions at the beginning (pre-instruction) and ending  
 147 (post-instruction) of the course. A robust body of evidence indicates that visuospatial ability (Pallrand and  
 148 Seeber, 1984; Kozhevnikov et al., 2002; Kozhevnikov and Thornton, 2006; Kozhevnikov et al., 2007) and  
 149 mathematical competency (Cohen et al., 1978; Basson, 2002; Hudson and Liberman, 2005; Dehipawala et  
 150 al., 2014; Korpershoek et al., 2015) are associated with and may predict physics learning and academic  
 151 performance. Since science, spatial, and math anxiety may impede performance (Hembree, 1990; Vitasari  
 152 et al., 2010; Núñez-Peña et al., 2013), we administered questionnaires probing science anxiety (Mallow,  
 153 1994), spatial anxiety (Lawton, 1994), and math anxiety (Alexander and Matray, 1989) collectively assess  
 154 STEM-related anxiety. In addition, the Beck anxiety inventory was completed to assess clinical anxiety  
 155 symptoms (Beck et al., 1988). To examine the relationships among STEM anxiety, brain connectivity, and  
 156 sex, we addressed the following fundamental questions. First, are there sex differences in anxiety scores?  
 157 Second, is there a relationship between STEM and clinical anxiety and functional connectivity? Third, are  
 158 anxiety scores correlated with academic performance? Finally, does anxiety mediate the relationship  
 159 between functional connectivity and academic performance? We predicted that anxiety scores would be  
 160 significantly higher for female versus male STEM students. We also anticipated that functional  
 161 connectivity would be correlated with STEM anxiety among both females and males, particularly when  
 162 considering the SN. Finally, we hypothesized that STEM anxiety would be negatively correlated with  
 163 academic performance for both female and male STEM students.

164  
 165

## 166 RESULTS

167

168 **Sex differences in STEM anxiety.** We performed mixed model ANOVA analyses for each anxiety measure<sup>1</sup>.  
 169 These analyses demonstrated significant main effects of sex on all measures of anxiety, including science,  
 170 spatial, math, and clinical anxiety (**Table 1**). Female students reported higher mean levels of anxiety on  
 171 every measure compared to male students at both pre- and post-instruction (**Fig. 1**). When considering  
 172 how students’ anxiety changed across the semester-long course, only science anxiety displayed a main  
 173 effect of time. Examining the marginal means for female students, science anxiety scores were  
 174 significantly increased at post-instruction (M = 16.43, SD = 10.76) compared to pre-instruction (M = 6.41,  
 175 SD = 7.96). Similar results were observed for male students: science anxiety scores were significantly  
 176 increased at post-instruction (M = 11.28, SD = 9.563) compared to pre-instruction (M = 3.15, SD = 3.498).  
 177 There was no significant interaction between participant sex and change in anxiety scores on any measure.

178

| Factor | Science  |          |                           | Spatial  |          |                           | Math     |          |                           | Clinical |          |                           |
|--------|----------|----------|---------------------------|----------|----------|---------------------------|----------|----------|---------------------------|----------|----------|---------------------------|
|        | <i>F</i> | <i>p</i> | $\eta^2_{\text{Partial}}$ | <i>F</i> | <i>p</i> | $\eta^2_{\text{Partial}}$ | <i>F</i> | <i>p</i> | $\eta^2_{\text{Partial}}$ | <i>F</i> | <i>p</i> | $\eta^2_{\text{Partial}}$ |
| Sex    | 9.08     | 0.003    | 0.08                      | 9.48     | 0.003    | 0.09                      | 12.42    | 0.001    | 0.11                      | 5.45     | 0.022    | 0.05                      |
| Time   | 101.52   | <0.001   | 0.51                      | 0.09     | 0.763    | 0.00                      | 0.38     | 0.538    | 0.00                      | 0.04     | 0.848    | 0.00                      |

<sup>1</sup> To assess the robustness of these results to potential violations of the assumptions of normality and equal variances, we replicated the analyses above using robust ANOVA methods recommended by Wilcox (2017). The robust ANOVAs returned the same pattern of results as the classical ANOVAs, strengthening our confidence in these findings. Additionally, we note that the same general pattern of results held when running the analyses using linear mixed model (multilevel) regressions, both with and without controlling for clinical anxiety when analyzing the remaining anxiety measures, available in Table S2 of the Supplementary Information (SI).

|             |      |       |      |      |       |      |      |       |      |      |       |      |
|-------------|------|-------|------|------|-------|------|------|-------|------|------|-------|------|
| Interaction | 1.10 | 0.297 | 0.01 | 0.76 | 0.387 | 0.01 | 0.20 | 0.657 | 0.00 | 1.17 | 0.282 | 0.01 |
|-------------|------|-------|------|------|-------|------|------|-------|------|------|-------|------|

Note:  $\eta^2_{\text{partial}}$  is reported as calculated by SPSS. Numerator and denominator degrees of freedom for all F ratios were 1 and 99, respectively.

179  
180  
181

**Table 1.** Results of Between-by-Within ANOVA on Anxiety Measures.

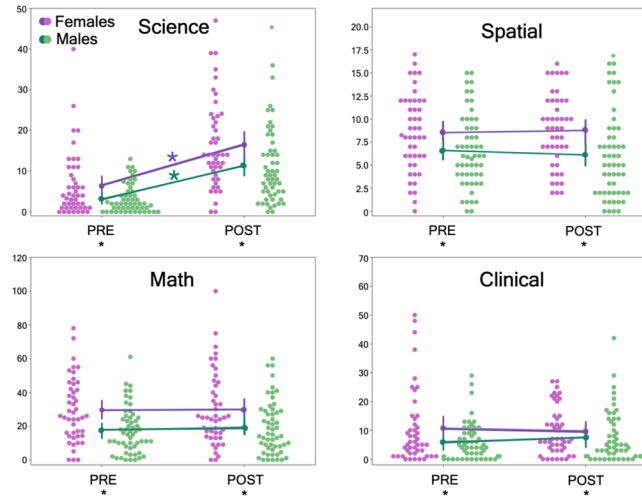

182  
183

**Fig. 1. Sex Differences in Anxiety.** Raw scores for science, spatial, math, and clinical anxiety (as measured by the Beck anxiety inventory) for female (purple) and male (green) undergraduate students enrolled in an introductory physics course. Anxiety was assessed at the beginning of the semester (i.e., pre-instruction or “PRE”) and at the completion of the course (i.e., post-instruction or “POST”). Black asterisks on bottom PRE/POST labels indicate significant sex differences in anxiety at PRE or POST. Purple and green asterisks indicate significant increases in science anxiety across time.

189

190  
191 **Neural correlates of anxiety.** To assess how functional brain connectivity relates to anxiety, we first identified the SN, DMN, and CEN using a data-driven, meta-analytic parcellation (Laird et al, 2011) (Fig. 2), extracted the average network time series from pre-processed rs-fMRI data, and constructed per-participant adjacency matrices reflecting the degree of between-network correlation across the three networks (Abraham et al., 2014). Motion was regressed out and high-motion volumes were censored (Power et al., 2014). The edge weights between the tripartite network connections were calculated as Pearson’s correlation coefficients between each network time series (e.g., inter-network functional connectivity between CEN-DMN, DMN-SN, and SN-CEN).

199

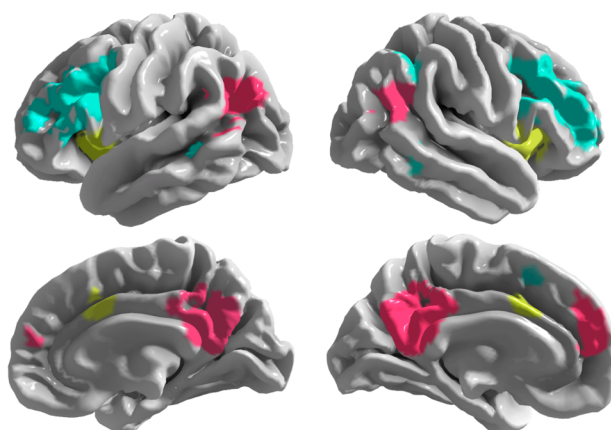

200

201  
202 **Fig. 2. Network Parcellation.** Network masks for the central executive (cyan), default mode (pink), and salience  
203 (yellow) networks were adapted from a data-driven, meta-analytic parcellation<sup>41</sup> and used to extract network-wise  
204 signals from pre-processed rs-fMRI data from each participant.

205  
206 To quantify putative relations between functional connectivity and anxiety, Pearson correlation  
207 coefficients were computed between the inter-network edge weights and anxiety scores, controlling for  
208 a false discovery rate of 0.25 using the Benjamini-Hochberg Procedure (Benjamini and Hochberg, 1995)  
209 (Fig. 3). At pre-instruction, among female students, there were no significant correlations between any of  
210 the anxiety scores and inter-network connectivity. In contrast, male students at pre-instruction exhibited  
211 significant correlations between science anxiety and CEN-DMN connectivity ( $r(53) = 0.275, P = 0.042, \alpha_{FDR} = 0.13$ ),  
212 science anxiety and DMN-SN ( $r = 0.311, P = 0.021, \alpha_{FDR} = 0.10$ ), spatial anxiety and CEN-DMN ( $r =$   
213  $0.366, P = 0.006, \alpha_{FDR} = 0.02$ ), math anxiety and CEN-DMN ( $r = 0.325, P = 0.015, \alpha_{FDR} = 0.08$ ), math anxiety  
214 and DMN-SN ( $r = 0.355, P = 0.008, \alpha_{FDR} = 0.04$ ), and clinical anxiety and SN-CEN ( $r = -0.343, P = 0.010, \alpha_{FDR}$   
215  $= 0.06$ ). The correlation between clinical anxiety and SN-CEN connectivity was the only significant negative  
216 correlation observed, as well as the only measure linked with SN-CEN connectivity. All STEM anxiety  
217 measures in males were positively correlated with the CEN-DMN and DMN-SN connectivity. We also  
218 tested for an effect of sex across these results and observed that the correlation between clinical anxiety  
219 and SN-CEN was significantly different between female and male students ( $Z = -2.927, P = 0.002$ ).

220  
221 At post-instruction, no significant correlations were observed between anxiety scores and inter-network  
222 connectivity for female students. Male students at post-instruction exhibited significant correlations  
223 between spatial anxiety and CEN-DMN ( $r(53) = 0.381, P = 0.004, \alpha_{FDR} = 0.04$ ), spatial anxiety and DMN-SN  
224 ( $r = 0.435, P = 0.001, \alpha_{FDR} = 0.02$ ), and math anxiety and DMN-SN ( $r = 0.332, P = 0.013, \alpha_{FDR} = 0.06$ ). As  
225 with pre-instruction results, the significant STEM-related correlations were positive and only significantly  
226 related to the CEN-DMN and DMN-SN, but not SN-CEN connectivity. Again, we also tested for an effect of  
227 sex across these results and observed that the spatial anxiety correlations with CEN-DMN and DMN-SN  
228 and significantly differed between female and male students ( $Z = -2.375, P = 0.009$  and  $Z = 3.094, P =$   
229  $0.001$ , respectively).

230  
231 In addition, we examined the correlations between the change in anxiety scores and the change in  
232 connectivity from pre- to post-instruction (detailed scatterplots shown in Fig. S2). Of these,  $\Delta\text{anxiety}_{\text{spatial}}$   
233 and  $\Delta\text{SN-CEN}$  were significantly negatively correlated for females ( $r(44) = -0.459, P = 0.001, \alpha_{FDR} = 0.02$ ),  
234 but not males ( $r(53) = -0.041, P = 0.764, \alpha_{FDR} = 0.23$ ), and the difference between sexes was statistically  
235 significant,  $Z = 2.208, P = 0.014$ . Thus, for female students, as spatial anxiety increased over time,  
236 connectivity between SN and CEN decreased. Conversely,  $\Delta\text{anxiety}_{\text{math}}$  and  $\Delta\text{SN-CEN}$  were significantly  
237 negatively correlated among male students ( $r(53) = -0.361, P = 0.007, \alpha_{FDR} = 0.02$ ), but not female students  
238 ( $r(44) = -0.057, P = 0.707, \alpha_{FDR} = 0.17$ ), and this difference between sexes was statistically significant,  $Z = -$   
239  $1.557, P = 0.06$ . Thus, for male students, as math anxiety increased over time, connectivity between the  
240 SN and CEN decreased.

241

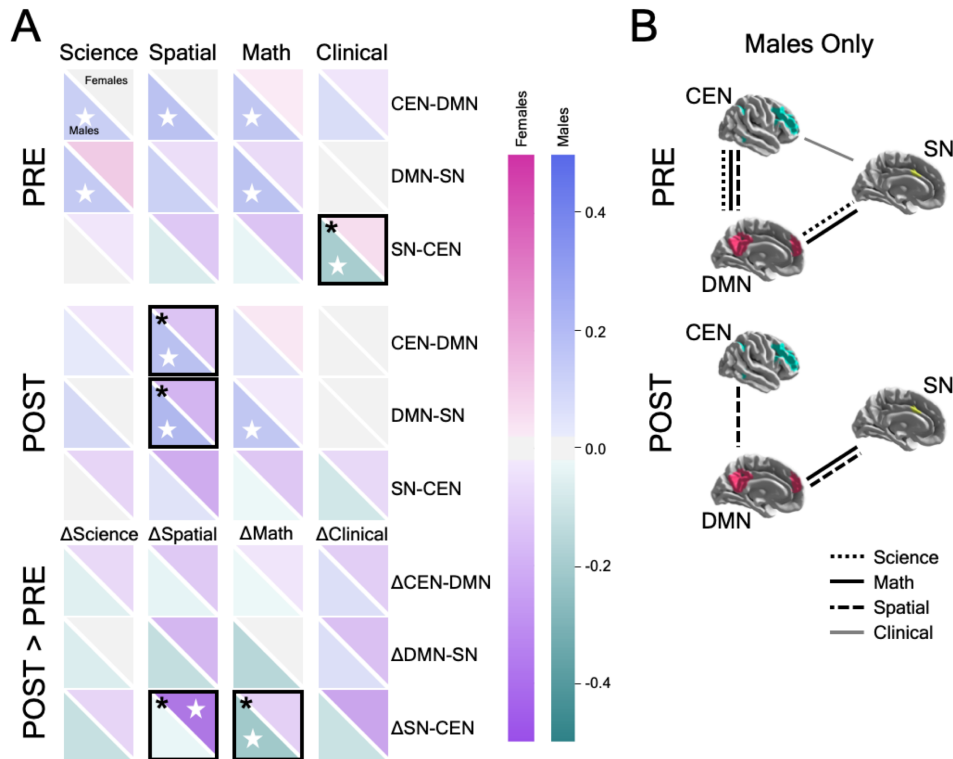

242  
243

**Fig. 3. Anxiety and Functional Brain Connectivity.** (A) Correlation values are shown between science, spatial, math, and clinical anxiety (columns) and between-network tripartite connectivity between the SN, DMN, and CEN networks (rows). Correlations are displayed for pre-instruction (“PRE”), post-instruction (“POST”), and the change across time (“POST > PRE”). Each square represents the correlation between anxiety and inter-network connectivity, with the upper diagonal displaying the value for female students and the lower diagonal representing male students. Positive and negative correlations are indicated by the color bars. Significant within-sex correlations are indicated by a white star, while significant between-sex correlations are indicated by a black box with an asterisk. (B) An alternative visualization of the results is provided to delineate the between-network correlations with anxiety in male students. While female students exhibited no significant correlations between anxiety and brain connectivity at pre- or post-instruction, male students exhibited several significant correlations at both time points. Males exhibited a general tendency to show fewer significant correlations at post- compared to pre-instruction associated with a reduced set of tripartite connections.

256

**Sex, anxiety, and academic performance.** Traditional measures of academic performance include measures of students’ grades. We collected each student’s overall GPA prior to taking the course, as well as their final physics course grade. First year students were excluded (2F, 6M) from the GPA analysis since they entered the physics course with a GPA of zero. No significant sex differences were observed for incoming GPA ( $U_{GPA} = 1051.5, P = 0.838, d = 0.293$ ) or physics course grade ( $U_{grade} = 1056.5, P = 0.148, d = 0.286$ ).

263

To quantify the relation between anxiety and academic performance, Pearson correlations were computed separately for female and male students, controlling for a false discovery rate of 0.25 using the Benjamini-Hochberg Procedure (Benjamini and Hochberg, 1995) (Fig. 4). Among female students at pre-instruction, GPA was positively correlated with spatial anxiety ( $r(42) = 0.381, P = 0.011, \alpha_{FDR} = 0.06$ ) while course grade was negatively correlated with math anxiety ( $r(44) = -0.321, P = 0.030, \alpha_{FDR} = 0.09$ ) and clinical anxiety ( $r(44) = -0.534, P < 0.001, \alpha_{FDR} = 0.03$ ). Among male students at pre-instruction, GPA was

269

270 only negatively correlated with math anxiety ( $r(47) = -0.358, P = 0.012, \alpha_{FDR} = 0.03$ ). The correlation  
 271 between GPA and clinical anxiety at pre-instruction significantly differed between females and males ( $Z =$   
 272  $2.364, P = 0.009$ ). Among female students at post-instruction, GPA was negatively correlated with clinical  
 273 anxiety ( $r(42) = -0.315, P = 0.037, \alpha_{FDR} = 0.06$ ), and grade was negatively correlated with both math anxiety  
 274 ( $r(44) = -0.293, P = 0.048, \alpha_{FDR} = 0.09$ ) and clinical anxiety ( $r(44) = -0.401, P = 0.006, \alpha_{FDR} = 0.03$ ). Among  
 275 male students at post-instruction, GPA was negatively correlated with science anxiety ( $r(47) = -0.370, P =$   
 276  $0.009, \alpha_{FDR} = 0.09$ ) and math anxiety ( $r(47) = -0.449, P = 0.001, \alpha_{FDR} = 0.03$ ), and similarly, grade was also  
 277 negatively correlated with science anxiety ( $r(53) = -0.354, P = 0.008, \alpha_{FDR} = 0.06$ ) and math anxiety ( $r(53)$   
 278  $= -0.422, P = 0.001, \alpha_{FDR} = 0.03$ ). Thus, in general, high levels of post-instruction STEM anxiety were  
 279 associated with poor academic performance. No significant sex differences at post-instruction were  
 280 observed.  
 281

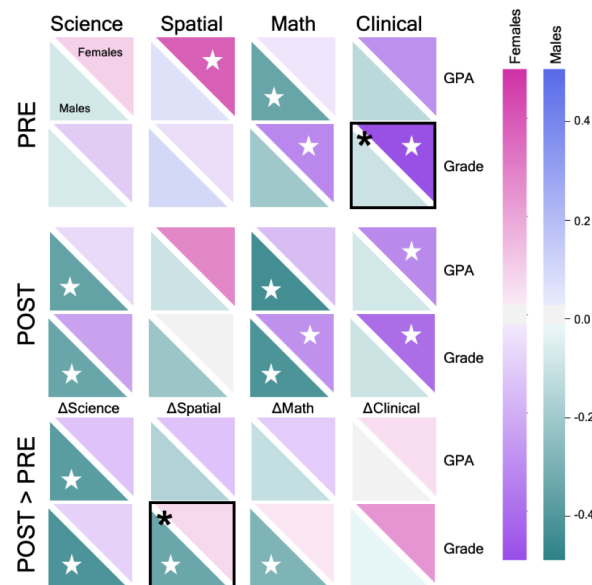

282  
 283  
 284 **Fig. 4. Sex, Anxiety, and Performance.** Correlation values are shown between science, spatial, math, and clinical  
 285 anxiety (columns) and pre-semester GPA and physics course grade (rows). Correlations are provided for pre-  
 286 instruction (“PRE”), post-instruction (“POST”), and the change across time (“POST > PRE”). Each square represents  
 287 the correlation between anxiety and GPA/grade, with the upper diagonal displaying the value for female students  
 288 and the lower diagonal representing the male students. Positive and negative correlations are indicated by the color  
 289 bars. Significant within-sex correlations are indicated by a white star, while significant between-sex correlations are  
 290 indicated by a black box with an asterisk.

291  
 292 Next, we examined the correlations between the change in anxiety scores and academic performance.  
 293 Female students demonstrated no significant correlations between GPA or grade and the change in any  
 294 anxiety measure. Conversely, male students exhibited significant negative correlations between grade  
 295 and  $\Delta$ anxiety<sub>science</sub> ( $r(53) = -0.393, P = 0.003, \alpha_{FDR} = 0.03$ ),  $\Delta$ anxiety<sub>spatial</sub> ( $r = -0.339, P = 0.011, \alpha_{FDR} = 0.06$ ),  
 296 and  $\Delta$ anxiety<sub>math</sub> ( $r = -0.296, P = 0.028, \alpha_{FDR} = 0.09$ ), as well as between GPA and  $\Delta$ anxiety<sub>science</sub> ( $r(47) = -$   
 297  $0.416, P = 0.003, \alpha_{FDR} = 0.03$ ). A significant sex effect was observed for the correlation between grade and  
 298  $\Delta$ anxiety<sub>spatial</sub> ( $Z = -2.033, P = 0.021$ ).  
 299

300 **Anxiety mediates brain function and performance.** Lastly, we investigated if functional brain connectivity  
 301 was correlated with academic performance at pre- or post-instruction, controlling for a false discovery



302 rate of 0.25 using the Benjamini-Hochberg Procedure (Benjamini and Hochberg, 1995) (Fig. 5a). For female  
 303 students, no significant correlations were observed between inter-network brain correlations and GPA or  
 304 course grade at either time point. For male students, there was a significant, negative correlation between  
 305 DMN-SN connectivity and course grade at post-instruction ( $r(53) = -0.267, P = 0.049, \alpha_{FDR} = 0.09$ ). Given  
 306 this result, we then asked to what extent anxiety might mediate the relationship between brain  
 307 connectivity and academic performance. We investigated four separate mediation models among male  
 308 students to determine if post-instruction science, spatial, math, or clinical anxiety was a mediating  
 309 variable on DMN-SN connectivity and course grade. We observed including math anxiety as a variable  
 310 reduced the total effect of DMN-SN and course grade, which was no longer significant (*indirect effect* = -  
 311 0.544,  $SE = 0.267, P = 0.042$ ; 95% bootstrap confidence intervals (CIs) = -1.161, -0.128) (Fig. 5b). Science,  
 312 spatial, and clinical anxiety were not found to mediate DMN-SN connectivity and course grade.  
 313

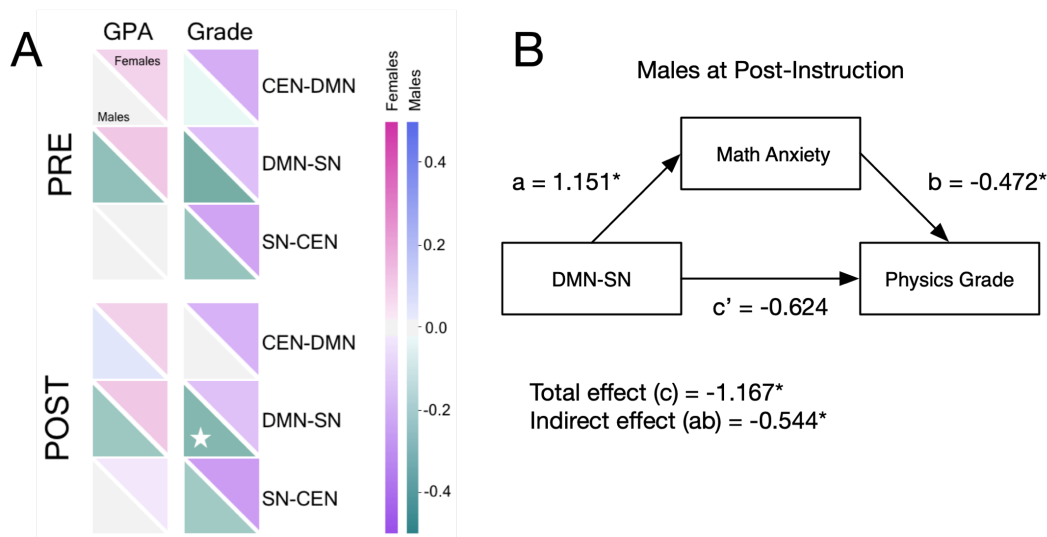

314  
 315  
 316 **Fig. 5. Post-instruction math anxiety mediates the relation between DMN-SN connectivity and physics course grade.**  
 317 (A) Correlation values are shown between pre-semester GPA and physics course grade (columns) and between-  
 318 network tripartite connectivity between the SN, DMN, and CEN networks (rows). Correlations are provided for pre-  
 319 instruction ("PRE") and post-instruction ("POST"). Each square represents the correlation between GPA/grade and  
 320 inter-network connectivity, with the upper diagonal displaying the value for female students and the lower diagonal  
 321 representing the male students. Positive and negative correlations are indicated by the color bars. Significant within-  
 322 sex correlations are indicated by a white star (B) Results of the mediation analysis indicated that every 1-unit increase  
 323 in post-instruction DMN-SN connectivity was associated with a  $a = 1.151$  ( $SE = 0.427, P = 0.007$ ) unit increase in post-  
 324 instruction math anxiety. Adjusting for post-instruction DMN-SN connectivity, every unit increase in post-instruction  
 325 math anxiety was associated with a  $b = -0.472$  ( $SE = 0.144, P = 0.001$ ) unit decrease in course grade. Increases in post-  
 326 instruction DMN-SN connectivity were associated with decreases in course grade, indirectly through increases in post-  
 327 instruction math anxiety. Specifically, for every  $a = 1.151$ -unit increase in post-instruction math anxiety, there was a  
 328  $ab = -0.544$  ( $SE = 0.267, P = 0.042$ ) unit decrease in course grade. Importantly, a bias-corrected bootstrapped  
 329 confidence interval with 10,000 samples (Rosseel et al., 2012) did not contain 0, 95% CI [-1.161, -0.128], indicating a  
 330 significant indirect effect (ab). Last, there was no sufficient evidence that post-instruction DMN-SN connectivity was  
 331 significantly associated with course grade, independent of its association with post-instruction math anxiety,  $c' = -$   
 332  $0.624$  ( $SE = 0.624, P = 0.318$ ).  
 333

## 334 DISCUSSION

335  
 336 Our results identified significant sex differences in STEM and clinical anxiety, among undergraduate  
 337 physics students, with females experiencing higher levels of STEM anxiety compared to their male

338 counterparts, in agreement with prior work (Alexander and Matray, 1989; Mallow, 1994; Lawton, 1994).  
339 While we observed significantly increased science anxiety from pre- to post-instruction in both female  
340 and male students, we found no evidence of an interaction between sex and change in anxiety scores.  
341 That is, our results do not suggest that the introductory physics course in our study differentially impacts  
342 changes in anxiety for female and male students. This is important from the perspective of educators who  
343 seek to create inclusive classrooms that are free from instructionally derived bias.

344  
345 Previous studies have shown that SN, DMN, and CEN dysfunction are implicated in clinical anxiety (Sripada  
346 et al., 2012; Zhang et al., 2015; Fan et al., 2017). We were surprised to see that female students exhibited  
347 no significant correlations between connectivity and anxiety at either time point. In contrast, male  
348 students exhibited multiple, significant positive correlations between connectivity and STEM anxiety at  
349 both pre- and post-instruction and a negative correlation between clinical anxiety and SN-CEN at pre-  
350 instruction. Dynamic interactions between the SN, DMN, and CEN are critical for successful execution of  
351 a wide range of cognitive and emotional processes. Healthy inter-network equilibrium is thought to rely  
352 on suppression of self-referential cognition in the DMN (Gusnard et al., 2001) to allow for identification  
353 of salient, task-relevant stimuli in the SN that should be relayed to the CEN (Sridharan et al., 2008),  
354 resulting in anti-correlations between the DMN and CEN (Fox et al., 2005). Evidence suggests that  
355 increased anxiety is associated with *increased* functional connectivity between the SN and DMN in clinical  
356 anxiety disorders (Sripada et al., 2012; Zhang et al., 2015; Fan et al., 2017). In contrast, the converse  
357 relationship has also been observed: higher levels of trait anxiety in healthy adolescents are related to  
358 *decreased* functional connectivity of the SN to DMN and CEN regions (Geng et al., 2016). Our current  
359 results in male students suggest anxiety-related disruption of inter-network equilibrium between the SN,  
360 DMN, and CEN and provide additional STEM-relevant support for the importance of suppressing self-  
361 referential DMN interactions to maintain a healthy balance across networks. DMN-SN connectivity was  
362 negatively correlated with course grade in male students at post-instruction, further supporting the  
363 importance of toggling off internal processing when salient events are detected in the context of STEM  
364 learning.

365  
366 Male students exhibited a general trend of fewer significant brain-anxiety correlations at post- compared  
367 to pre-instruction, despite increased science anxiety. Although speculative, this tendency is suggestive of  
368 a cognitive or physiological mechanism at play and may provide directions for future work. As male  
369 students are faced with the challenges of their first university-level physics course, the brain may  
370 accommodate the increases in science anxiety and balance the response to such challenges. In contrast,  
371 female students experience greater obstacles in STEM education that can trigger anxiety as early as the  
372 preschool and elementary years (Gunderson et al., 2012; Hill et al., 2016; Wong et al., 2017). The null  
373 female results may point to a lack of vulnerability, suggesting that their relatively higher STEM anxiety  
374 does not hinder salience-related central executive and self-referential processes. Female students may  
375 experience an earlier adaptive period as their STEM anxiety increases, resulting in a compensatory  
376 mechanism that down-regulates the anxiety-brain correlations, possibly via a reallocation of neural  
377 resources or a functional reorganization of anxiety-related systems. Overall, it is unclear if the sex  
378 differences in functional connectivity observed here reflect experiential differences in STEM anxiety-  
379 related developmental trajectories due to disruptions in emotion regulation (McRae et al., 2008),  
380 attentional control (Bishop et al., 2004; Gur et al., 2012; Roalf et al., 2014), motivation and drive  
381 (Freudenthaler et al., 2008; Bugler et al., 2015; Young et al., 2015), disengagement and avoidance  
382 (Panayoitou et al., 2017), coping strategy (Normann and Esborn, 2019) or a combination of these  
383 influences. Further work is needed to investigate sex differences in developmental STEM trajectories, to  
384 determine if female students experience STEM-related anxiety and learn strategies for counterbalancing  
385 their anxiety at an earlier educational stage.

386  
387 Aberrant connectivity between the CEN and SN in anxious individuals may result from a diminished ability  
388 to exert cognitive control and regulate emotional responses (Menon and Uddin, 2010). Previous work has  
389 shown that university students with high math anxiety exhibit increased SN activity when anticipating a  
390 math problem (Lyons and Beilock, 2012), yet math cue-related activity increased in the CEN as math deficit  
391 decreased, suggesting that increased recruitment of cognitive control processes may improve  
392 performance in math (Lyons and Beilock, 2011). Relatedly, lower math anxious children showed increased  
393 activation in regions of the CEN and DMN during math problem solving compared to higher math anxious  
394 children (Young et al., 2012) although the reverse was shown by Supekar et al. (2015) during successful  
395 math trials. This prior work in task-based fMRI has not addressed sex-related differences in the neural  
396 correlates of anxiety. Here, we showed math anxiety was consistently related to brain connectivity and  
397 performance for both sexes compared to other anxiety measures. Specifically, although math anxiety was  
398 not significantly related to SN-CEN inter-network connectivity in male students at pre- or post-instruction,  
399 the change in math anxiety was negatively correlated with the change in SN-CEN connectivity over the  
400 course of instruction. That is, as math anxiety increased across the semester for male students, SN-CEN  
401 connectivity also increased. Although higher levels of math anxiety are reported by female students, math  
402 anxiety has been more strongly linked to poor performance in precollege male students (Hembree, 1990).  
403 Our results related to math anxiety in male students suggest that the SN-CEN pathway may play a critical  
404 role in longitudinal changes across a semester of STEM learning, but that the DMN-SN pathway is more  
405 strongly related to course performance, with math anxiety mediating this relationship.

406  
407 Our study is limited by several concerns. First, our objective was to characterize sex differences in STEM  
408 anxiety in STEM undergraduate students. As such, recruitment and enrollment of participants who  
409 completed a core STEM course required broadly across STEM majors was deemed a key aspect of this  
410 study – our target sample was a wide range of STEM undergraduates, which we captured via an  
411 introductory physics course. However, it is likely that our results do not generalize to non-STEM  
412 undergraduates, given their different experiences with STEM-related coursework. Future work is needed  
413 to clarify how STEM anxiety may be differentially experienced by non-STEM students compared to STEM  
414 students. Second, students diagnosed with psychiatric or neurologic disorders were excluded; participants  
415 were also excluded if they reported use of psychotropic medications. Thus, our results may not generalize  
416 to a broader community of students that includes those diagnosed with and receiving treatment for  
417 clinical disorders of anxiety and depression. Third, although our primary analyses treated STEM and  
418 clinical anxiety as independent constructs, we acknowledge that this may not be the case for some  
419 students. We conducted collinearity diagnostics, which demonstrated that multicollinearity was not a  
420 concern for STEM and clinical anxiety measures. As an added step to reduce potential confounds by  
421 clinical anxiety, we performed partial Pearson correlation analyses that produced approximately equal,  
422 and even in some instances stronger, associations between STEM anxiety, functional connectivity, and  
423 academic performance when controlling for clinical anxiety. Both the collinearity diagnostics and the  
424 additional partial correlation analyses are available in the Supplemental Information (SI). Fourth, the  
425 timeline of the study created logistic challenges in that all data collection was carried out during short  
426 periods of time at the beginning and ending of each semester. As a result, while MRI sessions were  
427 completed following the final exam, our post-instruction behavioral data were generally scheduled the  
428 week prior to finals week (a period of time generally associated with increased anxiety levels among  
429 students). It is unclear how our results may be confounded by the temporal mismatch of MRI and  
430 behavioral sessions. Fifth, additional clarity may have been provided by including additional measures  
431 (e.g., the Positive and Negative Affect Schedule) to assess participant mood states on the day of scanning.  
432 Moreover, MRI scans may induce anxiety for some participants, especially those with high trait anxiety.  
433 Future work should strongly consider including measures of MRI-related anxiety (e.g., the Magnetic

434 Resonance Imaging-Anxiety Questionnaire (Ahlander et al., 2016)). Last, anxiety was assessed exclusively  
435 via self-report rating scales. Future work should include additional multi-method designs such as task-  
436 based fMRI with concurrent psychophysiological indexes of sympathetic and parasympathetic activity  
437 (e.g., respiratory sinus arrhythmia and skin conductance, respectively).

438  
439 Overall, our results indicate that female and male students experience different levels of STEM anxiety  
440 and exhibit different neurobiological systems-level support for this anxiety, which is differentially  
441 associated with their academic success. That this occurs despite no sex differences in performance (e.g.,  
442 GPA or course grade) is notable, and in agreement with two recent meta-analyses that provide strong  
443 evidence challenging the persistent stereotypes that male students possess higher innate aptitude in math  
444 and science compared to female students (Kersey et al., 2018; O’Dea et al., 2018). Importantly, the course  
445 studied here was shown to be equal (i.e., no significant interaction between sex and change in anxiety),  
446 but not equitable (i.e., did not reduce sex differences). The gender gap in STEM remains largely  
447 unexplained (Riegle-Crumb et al., 2012), yet our results suggest that female students maintain  
448 performance compared to their male counterparts while responding differently to obstacles and  
449 challenges associated with STEM learning. Organizations supporting women in STEM have long promoted  
450 the idea that reduced female representation in STEM is due to poor climate for women rather than lack  
451 of ability or interest. Our results support this framework. We recommend that positive changes in favor  
452 of promoting women in STEM should focus on addressing climate issues that contribute to STEM anxiety.  
453 At the elementary and secondary school level this could include improving parental and teacher support,  
454 which has been shown to significantly impact girls’ anxiety, confidence, and performance (Beilock et al.,  
455 2010; Gunderson et al., 2012; Casad et al., 2015). At the university level, this could include increasing  
456 visible role models (e.g., women as STEM faculty and in senior leadership positions; Winslow and Davis,  
457 2016), revising ineffective Title IX policies (a United States statute that protects students from sex-based  
458 discrimination in federally-funded education programs and activities; US Department of Education, 2015),  
459 and enacting a zero-tolerance policy for sexual harassment and abuse at institutions, research societies,  
460 and federal funding agencies. It is incumbent upon university leaders to optimize pathways for all students  
461 entering the national STEM workforce. Instructional techniques focused on helping students learn content  
462 while building positive affect may be of particular importance in supporting learning that is inclusive for  
463 all students, thereby retaining individuals that drop out of STEM careers due to these climate-related  
464 factors. Continued development of instructional practices should emphasize the important distinction  
465 between equality and equity.

466  
467 Broadly, female and male STEM students experience different learning environments, societal  
468 expectations, and academic opportunities, which all contribute to socio-emotional brain development,  
469 necessitating rigorous and objective standards for the study of sex and gender in neuroimaging research  
470 (Rippon et al., 2014). Our results demonstrate that sex differences in brain networks are not fixed and  
471 that STEM anxiety is related to changes in both female and male students’ brains during the physics  
472 learning process. We conclude that there are significant sex differences between STEM anxiety linked with  
473 large-scale brain networks and recommend future research to determine how reducing barriers and  
474 making the climate more equitable may enable a more inclusive STEM community.

475

476

## 477 **METHODS**

478

479 **Participants and Study Design.** One hundred and one healthy right-handed undergraduate students  
480 (mean age = 19.94 ± 2.46 years, range = 18-25 years; 46 females) who completed a semester of  
481 introductory calculus-based physics at Florida International University (FIU) took part in this study.

482 Participants self-reported that they were free from cognitive impairments, neurological and psychiatric  
483 conditions, and did not use psychotropic medications. The physics course emphasized problem solving  
484 skill development and covered topics in classical Newtonian mechanics, including motion along straight  
485 lines and in two and three dimensions, Newton's laws of motion, work and energy, momentum and  
486 collisions, and rotational dynamics. Students completed a behavioral and MRI session at two time points  
487 at the beginning ("pre-instruction") and conclusion ("post-instruction") of the 15-week semester. Pre-  
488 instruction data collection sessions were generally acquired no later than the fourth week of classes. Post-  
489 instruction sessions were completed no more than two weeks after the final exam. Written informed  
490 consent was obtained in accordance with FIU's Institutional Review Board approval.

491  
492 **Behavioral Measures.** Participants completed a series of self-report instruments during their pre- and  
493 post-instruction behavior session, including, but not limited to: the Science Anxiety Questionnaire  
494 (Mallow, 1994), the Spatial Anxiety Scale (Lawton, 1994), the Mathematics Anxiety Rating Scale (Alexander  
495 and Matray, 1989), and the Beck Anxiety Inventory (Beck et al., 1988). Tests were performed to determine  
496 if our data on science, spatial, math, and clinical anxiety met the assumption of collinearity and the results  
497 indicated that multicollinearity was not a concern; collinearity diagnostics are provided in the SI.  
498 Participants also provided their demographic details (e.g., biological sex, age).

499  
500 **Missing Data.** A missing value analysis indicated that less than 2% of the data were missing for each  
501 variable and these were observed to be missing completely at random (MCAR). We chose not to  
502 implement multiple imputation, expectation maximization, or regression because the data violated the  
503 assumption of multivariate normality (Dong and Peng, 2013). Given the small sample size, frequency of  
504 missingness (1-2%), and lack of systematic reasons for missingness, we implemented item-level mean  
505 substitution imputation to avoid case-wise deletion of missing data (Rubin et al., 2007).

506  
507 **fMRI Acquisition and Pre-Processing.** Neuroimaging data were acquired on a GE 3T Healthcare Discovery  
508 750W MRI scanner at the University of Miami. Resting state functional MRI (rs-fMRI) data were acquired  
509 with an interleaved gradient-echo, echo planar imaging (EPI) sequence (TR/TE = 2000/30ms, flip angle =  
510 75°, field of view (FOV) = 220x220mm, matrix size = 64x64, voxels dimensions = 3.4x3.4x3.4mm, 42 axial  
511 oblique slices). During resting-state scans participants were instructed to remain still with their eyes  
512 closed. A T1-weighted series was also acquired using a 3D fast spoiled gradient recall brain volume (FSPGR  
513 BRAVO) sequence with 186 contiguous sagittal slices (TI = 650ms, bandwidth = 25.0kHz, flip angle = 12°,  
514 FOV = 256x256mm, and slice thickness = 1.0mm). Each participant's structural T1-weighted image was  
515 oriented to the MNI152 2mm template using AFNI's (<http://afni.nimh.nih.gov/afni>; Cox, 1996)  
516 3dresample, then skull-stripped using the Brain Extraction Tool from FMRIB's Software Library (FSL,  
517 <https://fsl.fmrib.ox.ac.uk/fsl/fslwiki>; Smith et al., 2002; Jenkinson et al., 2012). Utilizing FSL's automated  
518 segmentation tool (FAST), tissue-type masks were generated to inform nuisance parameters (Zhang et al.,  
519 2001). Then, utilizing FSL's FLIRT (Jenkinson and Smith, 2001), the middle volume of each functional run  
520 was extracted and coregistered with the corresponding T1-weighted image. Utilizing FSL's MCFLIRT with  
521 spline interpolation, motion correction aligned all volumes of each subject's rs-fMRI time series with that  
522 middle volume. To further correct for in-scanner motion effects, functional volumes unduly affected by  
523 motion were identified using `fsl_motion_outliers`, with a framewise displacement threshold of 0.2mm  
524 (Power et al., 2014). Resultant motion artifacts were removed with ICA-AROMA ([https://github.com/rhr-  
525 pruum/ICA-AROMA](https://github.com/rhr-pruim/ICA-AROMA); Pruim et al., 2015). Then, CSF and WM masks were transformed into functional native  
526 space, eroded by 1 and 2 voxels, respectively, and from each the mean signal was extracted and used to  
527 regress out non-neural signals in a final nuisance regression step using AFNI's 3dTproject, which  
528 detrended and normalized the rs-fMRI time series, as well. Finally, rs-fMRI images were transformed into  
529 MNI152 2mm space for further data analysis.

530

531 **Network Parcellation and Brain Connectivity Analyses.** Each participant's rs-fMRI data were standardized  
532 and parcellated according to the meta-analytic network components described by Laird et al. (2011).  
533 Included in this parcellation are the salience network (SN), default mode network (DMN), and central  
534 executive network (CEN). As these networks were delineated via ICA, some overlap was present between  
535 component maps. This overlap was resolved by a combination of proportional thresholding and manual  
536 editing, performed with the Mango image analysis tool (v. 4.0.1, <http://ric.uthscsa.edu/mango/>); final  
537 networks are shown in **Fig. 2**. Adjacency matrices were constructed per participant using Nilearn (v. 0.3.1,  
538 <http://nilearn.github.io/index.html>), a Python (v 2.7.13) module, built on scikit-learn, for the statistical  
539 analysis of neuroimaging data (Abraham et al., 2014; Pedregosa et al., 2011). For each of the three  
540 networks of interest, a single time series was computed as an average of the rs-fMRI time series from all  
541 voxels within the network, after further regressing out six motion parameters (from MCFLIRT) and  
542 censoring high-motion volumes (framewise displacement >0.2mm), as well as the immediately preceding  
543 volume and two following volumes, following recommendations from Power et al. (2014). Edge weights  
544 for each graph were Pearson's correlations, calculated pairwise for the three networks, which are the  
545 graph's nodes, resulting in a 3x3 network-wise correlation matrix for each participant. Although our  
546 emphasis focused on characterizing the putative relationships between inter-network connectivity and  
547 anxiety, we additionally analyzed intra-network connectivity to explore the relationship between within-  
548 network cohesion and anxiety. Pairwise correlation coefficients between constituent nodes of the SN,  
549 DMN, and CEN were computed and averaged within each network to obtain measures of intra-network  
550 cohesion. Pearson correlation coefficients were calculated between intra-network cohesion and anxiety  
551 scores, including science, spatial, math, and clinical anxiety. Among both female and male students, no  
552 significant relationships were observed between intra-network cohesion and anxiety within the SN, DMN,  
553 or CEN at either pre- or post-instruction.

554

555 **Statistical Analyses.** All statistical tests were computed using IBM SPSS software, R Statistical Software,  
556 and Python tools/packages including Nilearn: Machine learning for Neuroimaging in Python, pandas  
557 (Python Data Analysis Library), matplotlib, Seaborn: statistical data visualization, Statsmodels, and SciPy.  
558 Observed *P* values are reported for statistical comparisons deemed significant after controlling for a false  
559 discovery rate of 0.25 using the Benjamini-Hochberg Procedure (Benjamini and Hochberg, 1995). The  
560 choice of the family of inferences over which an error rate is controlled is often ambiguous and a topic of  
561 scholarly debate (Holland and Cheung, 2002). In our study, we applied the Benjamini-Hochberg correction  
562 to each specific research question and assumed independence for each group and time point. For  
563 example, for the question "*What brain connections (3) correlate with anxiety (4) at pre-instruction for*  
564 *female students?*", we corrected for 12 tests. We utilized adjusted alpha levels for each family of  
565 comparisons to impose a more conservative criterion for significance and avoid Type I errors.

566

567

568

569 **Data Availability.** A GitHub repository was created at  
570 <http://github.com/nbclab/PhysicsLearning/tree/master/anxiety> to archive the source files for this study,  
571 including data analysis processing scripts and behavioral data. The network masks for the bilateral SN,  
572 DMN, and CEN are available via NeuroVault at <https://neurovault.org/collections/4727/>.

573

574

575 **ACKNOWLEDGMENTS**

576

577 Primary funding for this project was provided by NSF REAL DRL-1420627; additional support to various  
578 authors was provided by NSF 1631325, NIH R01 DA041353, NIH U01 DA041156, NSF CNS 1532061, NIH  
579 K01DA037819, NIH U54MD012393, and the FIU Graduate School Dissertation Year Fellowships. Thanks to  
580 Karina Falcone, Rosario Pintos Lobo, and Camila Uzcatogui for their assistance with data collection and to  
581 the Department of Psychology of the University of Miami for providing access to their MRI scanner. Special  
582 thanks to the FIU undergraduate students who volunteered and participated in this project.

583

584

585 **AUTHOR CONTRIBUTIONS**

586

587 ARL, EB, SMP, MTS, RWL conceived and designed the project. JEB, EIB, RO acquired behavioral and fMRI  
588 data. AG, KLB, JEB, ARL analyzed data. KLB, MCR, TS contributed scripts and pipelines. AG, KLB, JEB, ARL  
589 wrote the paper. ARL contributed to all aspects of the project.

590

591

592 **Competing Interests.** The authors declare no competing interests.

593

594

595

596

597

598

599

600

601

602

603

604

605

606

607

608

609

610

611

612

613

614

615

616

617

618

619

## REFERENCES

- 620  
621  
622 Abraham, A., Pedregosa, F., Eickenberg, M., Gervais, P., Mueller, A., Kossaifi, J., Gramfort, A., Thirion, B.,  
623 ... Varoquaux, G. Machine learning for neuroimaging with scikit-learn. *Frontiers in Neuroinformatics*  
624 8(14), 1-10 (2014). doi:10.3389/fninf.2014.00014  
625  
626 Ahlander, B. M., Årestedt, K., Engvall, J., Maret, E. & Ericsson, E. Development and validation of a  
627 questionnaire evaluating patient anxiety during Magnetic Resonance Imaging: The Magnetic  
628 Resonance Imaging-Anxiety Questionnaire (MRI-AQ). *Journal of Advanced Nursing* 72, 1368–1380  
629 (2016).  
630  
631 Alexander, L. & Martray, C. The development of an abbreviated version of the Mathematics Anxiety Rating  
632 Scale. *Measurement and Evaluation in Counseling and Development* 22(3), 143–150 (1989).  
633 doi:10.1177/001316448204200218.  
634  
635 Basson, I. Physics and mathematics as interrelated fields of thought development using acceleration as an  
636 example. *International Journal of Mathematical Education in Science and Technology* 33, 679–690  
637 (2002).  
638  
639 Baloğlu, M. & Koçak, R. A multivariate investigation of the differences in mathematics anxiety. *Personality*  
640 *and Individual Differences* 40(7), 1325–1335 (2006). doi:10.1016/j.paid.2005.10.009.  
641  
642 Beck, A. T., Epstein, N., Brown, G. & Steer, R. A. An inventory for measuring clinical anxiety: Psychometric  
643 properties. *Journal of Consulting and Clinical Psychology* 56(6), 893–897 (1988). doi:10.1037/0022-  
644 006X.56.6.893.  
645  
646 Beilock, S. L., Gunderson, E. A., Ramirez, G. & Levine, S. C. Female teachers' math anxiety affects girls'  
647 math achievement. *Proceedings of the National Academy of Sciences* 107(5), 1860–1863 (2010).  
648 doi:10.1073/pnas.0910967107.  
649  
650 Benjamini, Y. & Hochberg, Y. Controlling the false discovery rate: A practical and powerful approach to  
651 multiple testing. *Journal of the Royal Statistical Society* 57(1), 289–300 (1995). doi:10.2307/2346101.  
652  
653 Bishop, S., Duncan, J., Brett, M. & Lawrence, A. D. Prefrontal cortical function and anxiety: Controlling  
654 attention to threat-related stimuli. *Nature Neuroscience* 7, 184–188 (2004). doi:10.1038/nn1173.  
655  
656 Brownlow, S., Jacobi, T. & Rogers, M. Science anxiety as a function of gender and experience. *Sex Roles*  
657 42(1), 119–131 (2000). doi:10.1023/A:1007040529319.  
658  
659 Bugler, M., McGeown, S. P., & St Clair-Thompson, H. Gender differences in adolescents' academic  
660 motivation and classroom behaviour. *Educational Psychology* 35, 541–556 (2015).  
661 doi:10.1080/01443410.2013.849325.  
662  
663 Casad, B. J., Hale, P. & Wachs, F. L. Parent-child math anxiety and math-gender stereotypes predict  
664 adolescents' math education outcomes. *Frontiers in Psychology* 6, (2015).  
665 doi:10.3389/fpsyg.2015.01597.  
666



- 667 Cheryan, S., Siy, J. O., Vichayapai, M., Drury, B. J. & Kim, S. Do female and male role models who embody  
668 stem stereotypes hinder women's anticipated success in stem? *Social Psychological and Personality*  
669 *Science* 2(6), 656–664 (2011). doi:10.1177/1948550611405218.  
670
- 671 Cohen, D., Hillman, D.F. & Agne, R.M. Cognitive level and college physics achievement. *American Journal*  
672 *of Physics* 46, 1026-1029 (1978).  
673
- 674 Cox, R. W. AFNI: Software for analysis and visualization of functional magnetic resonance  
675 neuroimages. *Computers and Biomedical Research* 29, 162–173 (1996).  
676
- 677 Dehipawala, S., Shekoyan, V. & Yao, H. Using mathematics review to enhance problem solving skills in  
678 general physics classes. in *Proceedings of the 2014 Zone 1 Conference of the American Society for*  
679 *Engineering Education - "Engineering Education: Industry Involvement and Interdisciplinary Trends",*  
680 *ASEE Zone 1 2014* (IEEE Computer Society, 2014). doi:10.1109/ASEEZone1.2014.6820631  
681
- 682 Dong, Y. & Peng, C. Y. J. Principled missing data methods for researchers. *SpringerPlus* 2, 1–17 (2013).  
683 doi:10.1186/2193-1801-2-222.  
684
- 685 Dosenbach, N. U. F., Fair, D. A., Miezin, F. M., Cohen, A. L., Wenger, K. K., Dosenbach, R. A. T., ... Petersen,  
686 S. E. Distinct brain networks for adaptive and stable task control in humans. *Proceedings of the*  
687 *National Academy of Sciences* 104(26), 11073–11078 (2007). doi:10.1073/pnas.0704320104.  
688
- 689 Fan, J., Zhong, M., Gan, J., Liu, W., Niu, C., Liao, H., ... Zhu, X. Altered connectivity within and between the  
690 default mode, central executive, and salience networks in obsessive-compulsive disorder. *Journal of*  
691 *Affective Disorders* 223, 106–114 (2017). doi:10.1016/j.jad.2017.07.041.  
692
- 693 Fox, M. D. *et al.* The human brain is intrinsically organized into dynamic, anticorrelated functional  
694 networks. *Proceedings of the National Academy of Sciences* 102, 9673–9678 (2005).  
695
- 696 Gasiewski, J. A., Eagan, M. K., Garcia, G. A., Hurtado, S. & Chang, M. J. From Gatekeeping to Engagement:  
697 A Multicontextual, Mixed Method Study of Student Academic Engagement in Introductory STEM  
698 Courses. *Research in Higher Education* 53, 229–261 (2012).  
699
- 700 Geng, H., Li, X., Chen, J., Li, X., & Gu, R. Decreased intra- and inter-salience network functional connectivity  
701 is related to trait anxiety in adolescents. *Frontiers in Behavioral Neuroscience* 9, (2016).  
702 doi:10.3389/fnbeh.2015.00350.  
703
- 704 Greicius, M. D., Krasnow, B., Reiss, A. L. & Menon, V. Functional connectivity in the resting brain: A  
705 network analysis of the default mode hypothesis. *Proceedings of the National Academy of Sciences*  
706 100(1), 253–258 (2003). doi:10.1073/pnas.0135058100.  
707
- 708 Gunderson, E. A., Ramirez, G., Levine, S. C. & Beilock, S. L. The role of parents and teachers in the  
709 development of gender-related math attitudes. *Sex Roles* 66, 153–166 (2012). doi:10.1007/s11199-  
710 011-9996-2.  
711
- 712 Gur, R. C., Richard, J., Calkins, M. E., Chiavacci, R., Hansen, J. A., Bilker, W. B., ... Gur, R. E. Age group and  
713 sex differences in performance on a computerized neurocognitive battery in children age 8-21.  
714 *Neuropsychology* 26,251–265 (2012). doi:10.1037/a0026712.

- 715  
716 Gusnard, D. A., Akbudak, E., Shulman, G. L. & Raichle, M. E. Medial prefrontal cortex and self-referential  
717 mental activity: Relation to a default mode of brain function. *Proceedings of the National Academy*  
718 *of Sciences* 98, 4259–4264 (2001).  
719  
720 Hembree, R. The nature, effects, and relief of mathematics anxiety. *Journal for Research in Mathematics*  
721 *Education* 21(1), 33 (1990). doi:10.2307/749455.  
722  
723 Holland, B. & Cheung, S. H. Familywise robustness criteria for multiple-comparison procedures. *Journal*  
724 *of the Royal Statistical Society. Series B: Statistical Methodology* 64, 63–77 (2002).  
725  
726 Hernandez, P.R., Bloodhart, B., Adams, A.S. Barnes, R.T., Burt, M. Clinton, S.M., Du, W., Godfrey,  
727 E.nHenderson, H., Pollack, I.B. & Fischer, E.V. Role modeling is a viable retention strategy for  
728 undergraduate women in the geosciences. *Geosphere* 14(6), 2585–2593 (2018).  
729 doi: <https://doi.org/10.1130/GES01659.1>  
730  
731 Hill, F., Mammarella, I. C., Devine, A., Caviola, S., Passolunghi, M. C., & Szucs, D. Maths anxiety in primary  
732 and secondary school students: Gender differences, developmental changes and anxiety specificity.  
733 *Learning and Individual Differences* 48, 45–53 (2016). doi:10.1016/j.lindif.2016.02.006.  
734  
735 Hudson, H. T. & Liberman, D. The combined effect of mathematics skills and formal operational reasoning  
736 on student performance in the general physics course. *American Journal of Physics* 50, 1117–1119  
737 (2005).  
738  
739 Jenkinson, M. & Smith, S. A global optimisation method for robust affine registration of brain images.  
740 *Medical Image Analysis* 5(2), 143–156 (2001). doi:10.1016/S1361-8415(01)00036-6.  
741  
742 Jenkinson, M., Beckmann, C. F., Behrens, T. E. J. & Woolrich, M. W. FSL. *NeuroImage* 62(2), 782–790  
743 (2012). doi:10.1016/j.neuroimage.2011.09.015.  
744  
745 Kersey, A. J., Braham, E. J., Csumitta, K. D., Libertus, M. E. & Cantlon, J. F. No intrinsic gender differences  
746 in children’s earliest numerical abilities. *npj Science of Learning* 3(1), 12 (2018). doi:10.1038/s41539-  
747 018-0028-7.  
748  
749 Kiefer, A. K. & Sekaquaptewa, D. Implicit stereotypes, gender identification, and math-related outcomes:  
750 A prospective study of female college students: Research report. *Psychological Science* 18(1), 13–18  
751 (2007). doi:10.1111/j.1467-9280.2007.01841.x.  
752  
753 Kim, Y. K. & Yoon, H. K. Common and distinct brain networks underlying panic and social anxiety disorders.  
754 *Progress in Neuro-Psychopharmacology and Biological Psychiatry* 80, 115–122 (2018).  
755 doi:10.1016/j.pnpbp.2017.06.017.  
756  
757 Korpershoek, H., Kuyper, H. & van der Werf, G. The relation between students’ math and reading ability  
758 and their mathematics, physics, and chemistry examination grades in secondary  
759 education. *International Journal of Science and Mathematics Education* 13, 1013–1037 (2015).  
760

- 761 Kozhevnikov, M., Hegarty, M., & Mayer, R. E. (2002). Visual/spatial abilities in problem solving in physics.  
762 In M. Anderson, B. Meyer, & P. Olivier (Eds.), *Diagrammatic Representations and Reasoning* (pp.  
763 155–173). Springer-Verlag.  
764
- 765 Kozhevnikov, M. & Thornton, R. Real-time data display, spatial visualization ability, and learning force and  
766 motion concepts. *Journal of Science Education and Technology* 15, 111–132 (2006).  
767
- 768 Kozhevnikov, M., Motes, M. A. & Hegarty, M. Spatial visualization in physics problem solving. *Cognitive*  
769 *Science* 31, 549–579 (2007).  
770
- 771 Laird, A. R., Fox, P. M., Eickhoff, S. B., Turner, J. A., Ray, K. L., McKay, D. R., ... Fox, P. T. Behavioral  
772 interpretations of intrinsic connectivity networks. *Journal of Cognitive Neuroscience* 23(12), 4022–  
773 4037 (2011). doi:10.1162/jocn\_a\_00077.  
774
- 775 Lawton, C. A. Gender differences in way-finding strategies: Relationship to spatial ability and spatial  
776 anxiety. *Sex Roles* 30,765–779 (1994).  
777
- 778 Lyons, I. M. & Beilock, S. L. Mathematics anxiety: Separating the math from the anxiety. *Cerebral Cortex*  
779 22(9), 2102–2110 (2011). doi:10.1093/cercor/bhr289.  
780
- 781 Lyons, I. M. & Beilock, S. L. When Math Hurts: Math anxiety predicts pain network activation in  
782 anticipation of doing math. *PLoS ONE* 7(10), (2012). doi:10.1371/journal.pone.0048076.  
783
- 784 Mallow, J. V. Gender-related science anxiety: a first binational study. *Journal of Science Education and*  
785 *Technology* 3(4), 227–238 (1994). doi:10.1007/BF01575898.  
786
- 787 Mallow, J., Kastrup, H., Bryant, F., Hislop, N., Shefner, R. & Udo, M. Science anxiety, science attitudes, and  
788 gender: Interviews from a binational study. *Journal of Science Education and Technology* 19(4), 356–  
789 369 (2010). doi:10.1007/s10956-010-9205-z  
790
- 791 McRae, K., Ochsner, K. N., Mauss, I. B., Gabrieli, J. J. D. & Gross, J. J. Gender differences in emotion  
792 regulation: An fMRI study of cognitive reappraisal. *Group Processes and Intergroup Relations* 11,143–  
793 162 (2008). doi:10.1177/1368430207088035.  
794
- 795 Menon, V. & Uddin, L. Q. Saliency, switching, attention and control: a network model of insula function.  
796 *Brain structure & function* 214, 655–667 (2010). doi:10.1007/s00429-010-0262-0.  
797
- 798 Menon, V. Large-scale brain networks and psychopathology: A unifying triple network model. *Trends in*  
799 *Cognitive Sciences* 15(10), 483–506 (2011). doi:10.1016/j.tics.2011.08.003.  
800
- 801 Mochcovitch, M. D., Da Rocha Freire, R. C., Garcia, R. F. & Nardi, A. E. A systematic review of fMRI studies  
802 in generalized anxiety disorder: Evaluating its neural and cognitive basis. *Journal of Affective*  
803 *Disorders* 167, 336–342 (2014). doi:10.1016/j.jad.2014.06.041.  
804
- 805 Moss-Racusin, C. A., Dovidio, J. F., Brescoll, V. L., Graham, M. J. & Handelsman, J. Science faculty's subtle  
806 gender biases favor male students. *Proceedings of the National Academy of Sciences* 109(41), 16474–  
807 16479 (2012). doi:10.1073/pnas.1211286109.  
808

- 809 Normann, N., Esborn, B. H. How do anxious children attempt to regulate worry? Results from a qualitative  
810 study with an experimental manipulation. *Psychol Psychother*, In Press.  
811 <https://doi.org/10.1111/papt.12210>.  
812
- 813 Nosek, B. A., Smyth, F. L., Sriram, N., Lindner, N. M., Devos, T., Ayala, A., ... Greenwald, A. G. National  
814 differences in gender-science stereotypes predict national sex differences in science and math  
815 achievement. *Proceedings of the National Academy of Sciences* 106, 10593–10597 (2009).  
816 doi:10.1073/pnas.0809921106.  
817
- 818 Núñez-Peña, M. I., Suárez-Pellicioni, M. & Bono, R. Effects of math anxiety on student success in higher  
819 education. *International Journal of Educational Research* 58, 36–43 (2013).  
820
- 821 O'Dea, R. E., Lagisz, M., Jennions, M. D., Nakagawa, S. Gender differences in individual variation in  
822 academic grades fail to fit expected patterns for STEM. *Nat Commun* 9(10), 3777 (2018).  
823 doi:10.1038/s41467-018-06292-0.  
824
- 825 Pallrand, G. J. & Seeber, F. Spatial ability and achievement in introductory physics. *Journal of Research in*  
826 *Science Teaching* 21, 507–516 (1984).  
827
- 828 Panayiotou, G., Karekla, M. & Leonidou, C. Coping through avoidance may explain gender disparities in  
829 anxiety. *Journal of Contextual Behavioral Science* 6, 215–220 (2017). doi:10.1016/j.jcbs.2017.04.005.  
830
- 831 Pedregosa, F., Weiss, R. & Brucher, M. Scikit-learn : Machine Learning in Python. *Journal of Machine*  
832 *Learning Research* 12,2825–2830 (2011). doi:10.1016/j.molcel.2012.08.019.  
833
- 834 Petersen, A., Thome, J., Frewen, P., Lanius, R. A. Resting-state neuroimaging studies: A new way of  
835 identifying differences and similarities among the anxiety disorders?. *Can J Psychiatry* 59(6), 294–  
836 300 (2014). <https://doi.org/10.1177/070674371405900602>.  
837
- 838 Power, J. D., Mitra, A., Laumann, T. O., Snyder, A. Z., Schlaggar, B. L., & Petersen, S. E. Methods to detect,  
839 characterize, and remove motion artifact in resting state fMRI. *NeuroImage* 84, 320–341 (2014).  
840 doi:10.1016/j.neuroimage.2013.08.048.  
841
- 842 Pruim, R. H. R., Mennes, M., Buitelaar, J. K. & Beckmann, C. F. Evaluation of ICA-AROMA and alternative  
843 strategies for motion artifact removal in resting state fMRI. *NeuroImage* 112, 278–287 (2015).  
844 doi:10.1016/j.neuroimage.2015.02.063.  
845
- 846 Rabany, L., Diefenbach, G. J., Bragdon, L. B., Pittman, B. P., Zertuche, L., Tolin, D. F., Goethe, J. W., Assaf,  
847 M. Resting-state functional connectivity in generalized anxiety disorder and social anxiety disorder:  
848 Evidence for a dimensional approach. *Brain Connect* 7(5), 289–298 (2017).  
849 <https://doi.org/10.1089/brain.2017.0497>.  
850
- 851 Raichle, M. E. The brain's default mode network. *Annual Review of Neuroscience* 38(1), 433–447 (2015).  
852 doi:10.1146/annurev-neuro-071013-014030.  
853
- 854 Rask, K. Attrition in STEM fields at a liberal arts college: The importance of grades and pre-collegiate  
855 preferences. *Economics of Education Review* 29, 892–900 (2010).  
856

- 857 Riegle-Crumb, C., King, B., Grodsky, E. & Muller, C. The more things change, the more they stay the same?  
858 Prior achievement fails to explain gender inequality in entry into STEM college majors over time.  
859 *American Educational Research Journal* 49(6), 1048–1073 (2012). doi:10.3102/0002831211435229.  
860
- 861 Rippon, G., Jordan-Young, R., Kaiser, A., & Fine, C. Recommendations for sex/gender neuroimaging  
862 research: Key principles and implications for research design, analysis, and interpretation. *Frontiers*  
863 *in human neuroscience* 8(650), 1-13 (2014). doi:10.3389/fnhum.2014.00650.  
864
- 865 Roalf, D. R., Gur, R. E., Ruparel, K., Calkins, M. E., Satterthwaite, T. D., Bilker, W. B., ... Gur, R. C. Within-  
866 individual variability in neurocognitive performance: Age- and sex-related differences in children and  
867 youths from ages 8 to 21. *Neuropsychology* 28, 506–518 (2014). doi:10.1037/neu0000067.  
868
- 869 Rosseel, Y. lavaan: an R package for structural equation modeling and more. *Journal of Statistical*  
870 *Computing* 48(2), 1–36 (2012). doi:10.18637/jss.v048.i02.  
871
- 872 Rubin, L. H., Witkiewitz, K., Andre, J. S. & Reilly, S. Methods for handling missing data in the Behavioral  
873 Neurosciences: Don't throw the baby out with the bath water. *Journal of Undergraduate*  
874 *Neuroscience Education* 5(2), A71-7 (2007).  
875
- 876 Seeley, W. W., Menon, V., Schatzberg, A. F., Keller, J., Glover, G. H., Kenna, H., ... Greicius, M. D. Dissociable  
877 intrinsic connectivity networks for salience processing and executive control. *Journal of Neuroscience*  
878 27(9), 2349–2356 (2007). doi:10.1523/JNEUROSCI.5587-06.2007.  
879
- 880 Sha, Z., Wager, T. D., Mechelli, A. & He, Y. Common dysfunction of large-scale neurocognitive networks  
881 across psychiatric disorders. *Biological Psychiatry* (2018). doi:10.1016/j.biopsych.2018.11.011.  
882
- 883 Shapiro, J. R. & Williams, A. M. The role of stereotype threats in undermining girls' and women's  
884 performance and interest in STEM fields. *Sex Roles* 66(3-4), 175–183 (2012). doi:10.1007/s11199-  
885 011-0051-0.  
886
- 887 Smith, S. M. Fast robust automated brain extraction. *Human Brain Mapping* 17(3),143–155 (2002).  
888 doi:10.1002/hbm.10062.  
889
- 890 Sridharan, D., Levitin, D. J. & Menon, V. A critical role for the right fronto-insular cortex in switching  
891 between central-executive and default-mode networks. *Proceedings of the National Academy of*  
892 *Sciences* 105, 12569–12574 (2008).  
893
- 894 Sripada, R. K., King, A. P., Welsh, R. C., Garfinkel, S. N., Wang, X., Sripada, C. S., & Liberzon, I. Neural  
895 dysregulation in posttraumatic stress disorder: Evidence for disrupted equilibrium between salience  
896 and default mode brain networks. *Psychosomatic Medicine* 74(9), 904–911 (2012).  
897 doi:10.1097/PSY.0b013e318273bf33.  
898
- 899 Strenta, A. C., Elliot, R., Adair, R., Matier, M., and Scott, J. Choosing and leaving science in highly selective  
900 institutions. *Research in Higher Education* 35, 513–547 (1994). doi: 10.1007/BF02497086  
901
- 902 Supekar, K., Iuculano, T., Chen, L. & Menon, V. Remediation of childhood math anxiety and associated  
903 neural circuits through cognitive tutoring. *Journal of Neuroscience* 35(36), 12574–12583 (2015).  
904 doi:10.1523/JNEUROSCI.0786-15.2015.

- 905  
906 Thiry, H., Laursen, S. L. & Hunter, A.-B. What Experiences Help Students Become Scientists? A Comparative  
907 Study of Research and other Sources of Personal and Professional Gains for STEM Undergraduates.  
908 *The Journal of Higher Education* 82, 357–388 (2011).  
909
- 910 U.S. Department of Education, Office for Civil Rights, Title IX Resource Guide (Apr. 2015).  
911 [https://www2.ed.gov/about/offices/list/ocr/docs/tix\\_dis.html](https://www2.ed.gov/about/offices/list/ocr/docs/tix_dis.html)  
912
- 913 Vitasari, P., Wahab, M. N. A., Othman, A., Herawan, T. & Sinnadurai, S. K. The relationship between study  
914 anxiety and academic performance among engineering students. in *Procedia - Social and Behavioral*  
915 *Sciences* 8, 490–497 (2010).  
916
- 917 Williams, L. M. Defining biotypes for depression and anxiety based on large-scale circuit dysfunction: a  
918 theoretical review of the evidence and future directions for clinical translation. *Depression and*  
919 *Anxiety* 34(1), 9–24 (2017). doi:10.1002/da.22556.  
920
- 921 Wilcox, R. (2017). *Modern statistics for the social and behavioral sciences: A practical introduction*. (2nd  
922 ed.). Boca Raton, FL: CRC Press.  
923
- 924 Winslow, S. & Davis, S. N. Gender inequality across the academic life course. *Sociology Compass* 10(5),  
925 404–416 (2016). doi:10.1111/soc4.12372.  
926
- 927 Wong, W. I. The space-math link in preschool boys and girls: Importance of mental transformation,  
928 targeting accuracy, and spatial anxiety. *British Journal of Developmental Psychology* 35, 249–266  
929 (2017). doi:10.1111/bjdp.12161.  
930
- 931 Young, A. M., Wendel, P. J., Esson, J. M. & Plank, K. M. Motivational decline and recovery in higher  
932 education STEM courses. *International Journal of Science Education* 40, 1016–1033 (2018).  
933 doi:10.1080/09500693.2018.1460773.  
934
- 935 Young, C. B., Wu, S. S. & Menon, V. The neurodevelopmental basis of math anxiety. *Psychological Science*  
936 23(5), 492–501 (2012). doi:10.1177/0956797611429134.  
937
- 938 Zhang, Y., Brady, M. & Smith, S. Segmentation of brain MR images through a hidden Markov random field  
939 model and the expectation-maximization algorithm. *IEEE Transactions on Medical Imaging* 20(1),45–  
940 57 (2001). doi:10.1109/42.906424.  
941
- 942 Zhang, Y., Liu, F., Chen, H., Li, M., Duan, X., Xie, B., & Chen, H. Intranetwork and internetwork functional  
943 connectivity alterations in post-traumatic stress disorder. *Journal of Affective Disorders* 187, 114–  
944 121 (2015). doi:10.1016/j.jad.2015.08.043.
